# Supplementary material for: Nitrogen-enriched carbon-coated flower-like bismuth sulfide architectures towards high-performance lithium-ion battery anodes
Source: Royal Society of Chemistry journal article supplement (doi:10.1039/c9qi00062c), 2019-01-01

*Supporting information for*

**Nitrogen-enriched carbon coating flower-like bismuth sulfide architectures  
towards high performance lithium ion battery anodes**

Shuwen Wang, Wenda Li, Haochen Song, Changming Mao, Zhonghua Zhang,  
HongruiPeng\* and Guicun Li\*

College of Materials Science and Engineering, Qingdao University of Science and  
Technology, Qingdao 266042, China

E-mail: penghongrui@qust.edu.cn and guicunli@qust.edu.cn

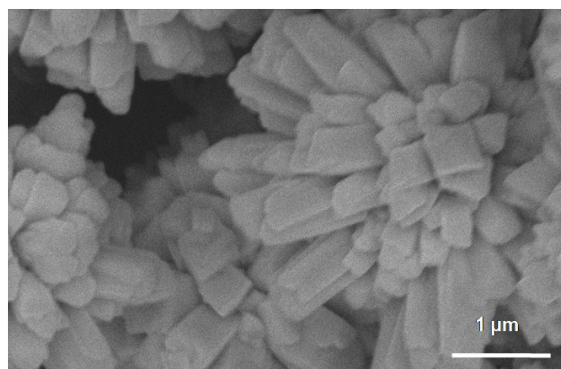

**Figure S1** The SEM image of without PVP.

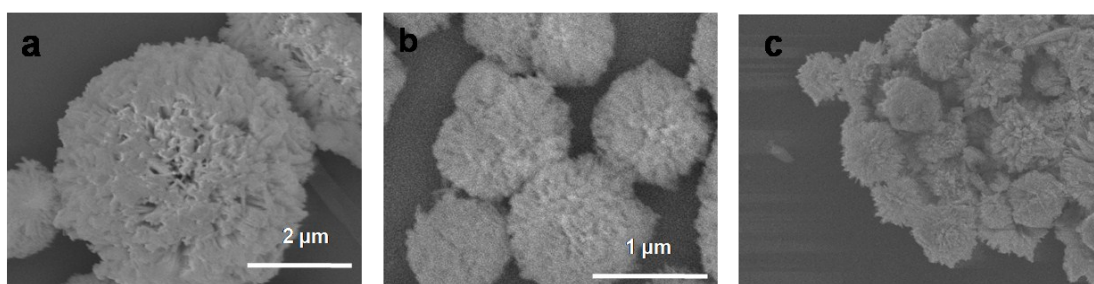

**Figure S2** The SEM image of the poly-dopamine coated flower-like  $\text{Bi}_2\text{S}_3$  structures (a and b); The SEM image of flower-like  $\text{N-C@Bi}_2\text{S}_3$  structures (c).

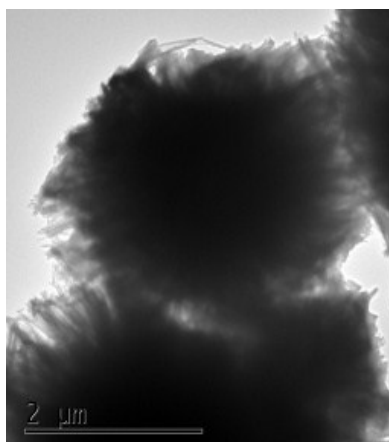

**Figure S3** The TEM image of flower-like  $\text{N-C@Bi}_2\text{S}_3$  structures.

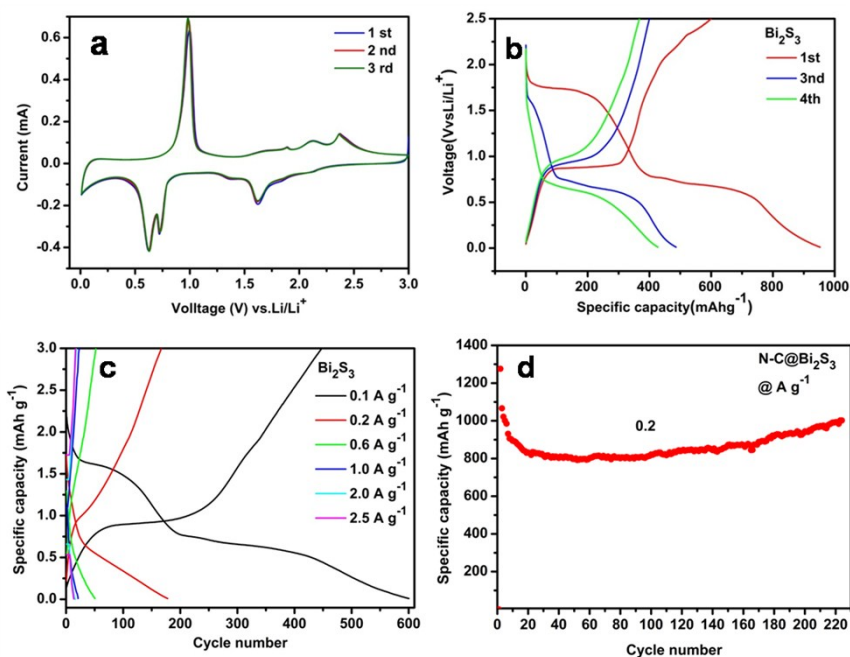

**Figure S4** Typical CV curve (a) of the N-C@Bi<sub>2</sub>S<sub>3</sub> electrode at 0.2 mV s<sup>-1</sup>; Galvanostatic charge-discharge profiles (b) of the Bi<sub>2</sub>S<sub>3</sub> electrode at 0.1 A g<sup>-1</sup>; Galvanostatic charge-discharge profiles (c) of the Bi<sub>2</sub>S<sub>3</sub> electrode at varied current densities; The long-term cycling performance (d) of N-C@Bi<sub>2</sub>S<sub>3</sub> electrodes at 0.2 A g<sup>-1</sup>.

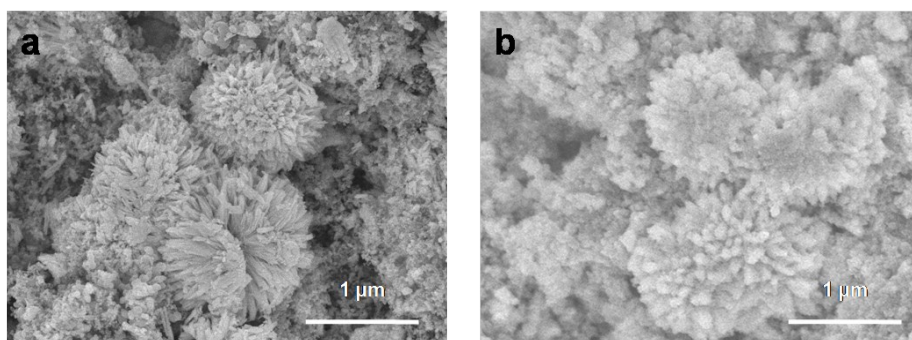

**Figure S5** The SEM image of before (a) and after (b) cycling.

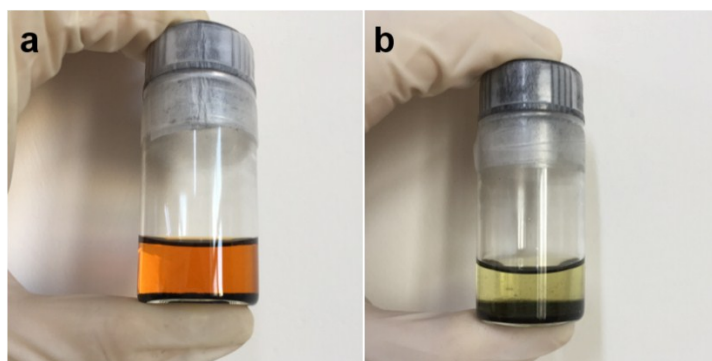

**Figure S6** Digital photograph of the fresh  $\text{Li}_2\text{S}_6/\text{N-C@Bi}_2\text{S}_3$  mixtures and the aged  $\text{Li}_2\text{S}_6/\text{N-C@Bi}_2\text{S}_3$  mixtures (three days).

**Table S1** The content of various C and N.

|                    | N1   | N2 | N3   | N4  | C-C | C-N  | C-O | C=O | O-C=O |
|--------------------|------|----|------|-----|-----|------|-----|-----|-------|
| <b>Content (%)</b> | 33.5 | 7  | 55.1 | 4.4 | 57  | 29.1 | 6.3 | 2.5 | 5.1   |

**Table S2** The performance comparisons between this work and previously reported works.

| Cathodes                                  | Density ( $\text{A g}^{-1}$ ) | Cycle number | Capacity ( $\text{mAh g}^{-1}$ ) |
|-------------------------------------------|-------------------------------|--------------|----------------------------------|
| Our work                                  | 1/0.2                         | 950/224      | 617/1001.7                       |
| $\text{Bi}_2\text{S}_3@\text{C}^{39}$     | 0.1                           | 100          | 765                              |
| $\text{Bi}_2\text{S}_3@\text{CNW}^{17}$   | 1                             | 700          | 501                              |
| $\text{Bi}_2\text{S}_3@\text{SC}^5$       | 1                             | 1000         | 550                              |
| $\text{rGO@Bi}_2\text{S}_3^{41}$          | 0.5                           | 400          | > 300                            |
| $\text{Bi}_2\text{S}_3\text{-PPY}^7$      | 1.2                           | 500          | 450                              |
| $\text{Bi}_2\text{S}_3@\text{SiO}_2^{36}$ | 1                             | 4000         | 379                              |
| GVB <sup>40</sup>                         | 0.1                           | 100          | 702                              |
| $\text{Bi}_2\text{S}_3@\text{C}^{16}$     | 0.6                           | 40           | 301                              |

**Table S3** The electrochemical data from EIS analysis ( $R_s$  is solution resistance;  $R_{ct}$  is charge transfer resistance).

| Electrode                                       | $R_s$ | $R_{ct}$ |
|-------------------------------------------------|-------|----------|
| N-C@Bi <sub>2</sub> S <sub>3</sub> before cycle | 4.432 | 178.7    |
| N-C@Bi <sub>2</sub> S <sub>3</sub> after cycle  | 4.319 | 713.5    |
| Bi <sub>2</sub> S <sub>3</sub> before cycle     | 1.491 | 401      |
| Bi <sub>2</sub> S <sub>3</sub> after cycle      | 11.32 | 1246     |

Equivalent circuit

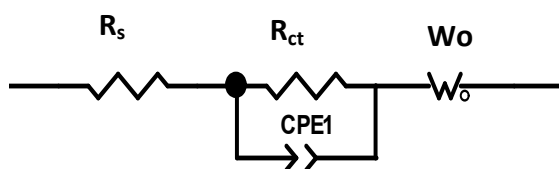

Supplement: c9qi00062c1.pdf [file c9qi00062c1.pdf]
